# Supplementary material for: New insight into the structure and function of Hfq C-terminus
Source: PubMed Central journal article supplement (PMC4413018; doi:10.1042/bsr20140128), 2015-04-28
Supplement: bsr035e190ntsadd.pdf [file bsr035e190ntsadd.pdf]

**Figure S1** Comparison of HfqCTRp (left) and HfqNTRp (right) self-assembly. TEM negative staining micrographs of HfqCTRp and HfqNTRp. Peptides were reconstituted in phosphate buffer 100 mM pH7 at 20 mg/mL for few days and then diluted for TEM analysis (see Experimental). Only HfqCTRp showed self-assembly into extended fibrillar structures whereas the HfqNTRp did not. The peptide, HfqNTRp, corresponding to Hfq N-terminal region (residues 1 to 72) was synthesized based on the following sequence:

MAKGQSLQDPFLNALRRERVPVSIYLVNGIKLQGQIESFDQFVILLKNTVSQMVYKHAISTVVPSRPVSHHS

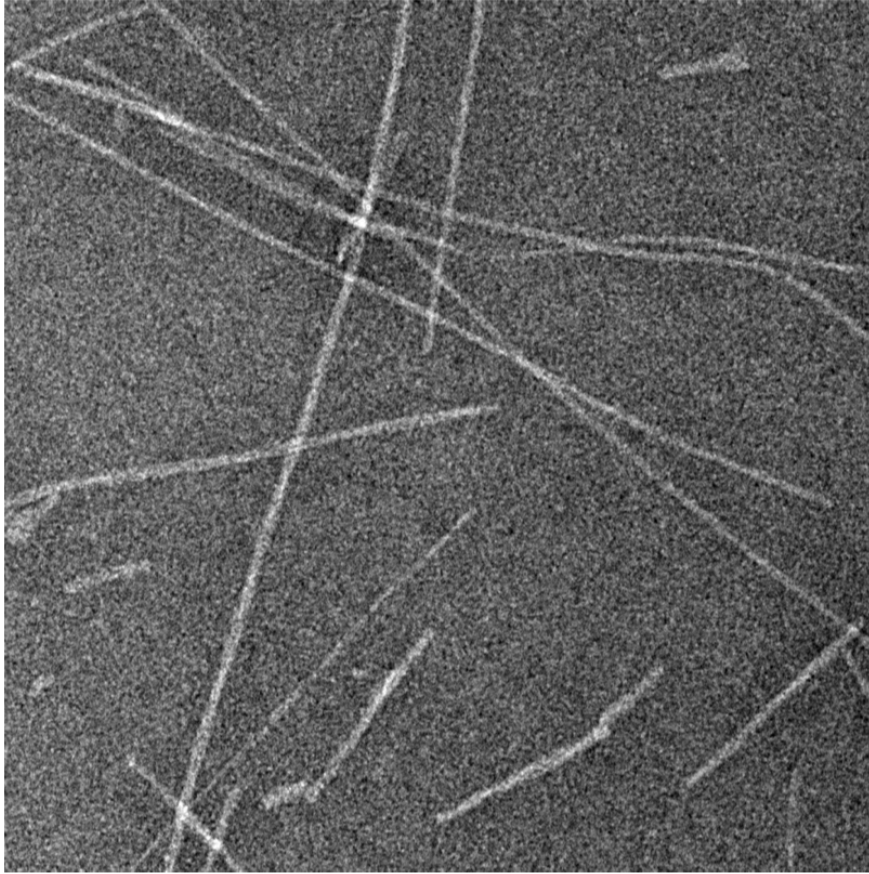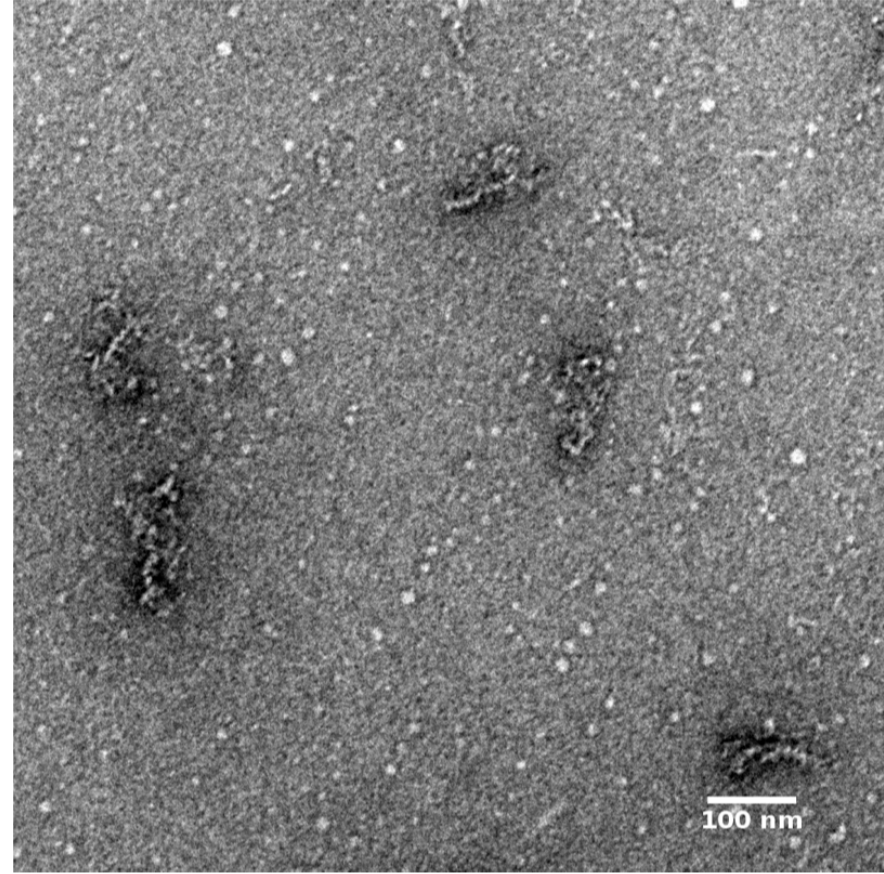

Figure S1
